# Supplementary material
Source: PubMed Central journal article supplement (PMC1360289)
Supplement: nar_34_2_676__1.pdf [file nar_34_2_676__1.pdf]

## Supplementary material

for

**Two conformational states in the crystal structure of the *Homo sapiens* cytoplasmic ribosomal decoding A site.**

Jiro Kondo<sup>1</sup>, Alexandre Urzhumtsev<sup>2</sup> and Eric Westhof<sup>1\*</sup>

<sup>1</sup>*Institut de Biologie Moléculaire et Cellulaire, UPR9002 CNRS, Université Louis Pasteur, 15 rue René Descartes, 67084 Strasbourg, France and*

<sup>2</sup>*Faculté des Sciences, Université Henri Poincaré, Vandoeuvre-lès-Nancy, 54506 Nancy, France*

\* To whom correspondence should be addressed E-mail:

Tel: +33-3-88-41-70-46

Fax: +33-3-88-60-18-22

Email: E.Westhof@ibmc.u-strasbg.fr

**Supplementary Table 1.** Crystal data and statistics of data collection.

|                                            | Low resolution dataset                            | High resolution dataset                           |
|--------------------------------------------|---------------------------------------------------|---------------------------------------------------|
| <u>Crystal data</u>                        |                                                   |                                                   |
| Space group                                | <i>P</i> 2 <sub>1</sub> 2 <sub>1</sub> 2          | <i>P</i> 2 <sub>1</sub> 2 <sub>1</sub> 2          |
| Unit cell (Å)                              | <i>a</i> = 46.1, <i>b</i> = 47.2, <i>c</i> = 56.7 | <i>a</i> = 46.1, <i>b</i> = 47.4, <i>c</i> = 56.8 |
| <i>Z</i> <sup>a</sup>                      | 1                                                 | 1                                                 |
| <u>Data collection</u>                     |                                                   |                                                   |
| Beamline                                   | BM16 of ESRF                                      | ID14-1 of ESRF                                    |
| Wavelength (Å)                             | 0.9795                                            | 0.9340                                            |
| Resolution (Å)                             | 57.0-2.8                                          | 29.0-2.3                                          |
| of the outer shell (Å)                     | 3.0-2.8                                           | 2.4-2.3                                           |
| Observed reflections                       | 66140                                             | 16221                                             |
| Unique reflections                         | 3304                                              | 4878                                              |
| Completeness (%)                           | 100.0                                             | 83.1                                              |
| in the outer shell (%)                     | 100.0                                             | 78.5                                              |
| <i>R</i> <sub>merge</sub> <sup>b</sup> (%) | 14.3                                              | 11.7                                              |
| in the outer shell (%)                     | 42.8                                              | 29.2                                              |

<sup>a</sup>Number of dsRNA in the asymmetric unit.

<sup>b</sup> $R_{\text{merge}} = 100 \times \sum_{hklj} |I_{hklj} - \langle I_{hklj} \rangle| / \sum_{hklj} \langle I_{hklj} \rangle$ .

**Supplementary Table 2.** Statistics of structure refinement.

|                                       | High resolution dataset                                                                 |
|---------------------------------------|-----------------------------------------------------------------------------------------|
| Resolution range (Å)                  | 10-2.3 ( $F_o > 3\sigma$ )                                                              |
| Used reflections                      | 4823                                                                                    |
| <i>R</i> -factor <sup>a</sup> (%)     | 24.7                                                                                    |
| <i>R</i> <sub>free</sub> <sup>b</sup> | 28.2                                                                                    |
| Number of DNA atoms                   | 920                                                                                     |
| Number of cations                     | 3 [Co(NH <sub>3</sub> ) <sub>6</sub> ] <sup>3+</sup> , 2 hexa-hydrated Mg <sup>2+</sup> |
| Number of water molecules             | 51                                                                                      |
| R.m.s. deviation                      |                                                                                         |
| Bond length (Å)                       | 0.005                                                                                   |
| Bond angles (°)                       | 1.1                                                                                     |
| Improper angles (°)                   | 1.8                                                                                     |

<sup>a</sup> $R\text{-factor} = 100 \times \sum ||F_o| - |F_c|| / \sum |F_o|$ , where  $|F_o|$  and  $|F_c|$  are optimally scaled observed and calculated structure factor amplitudes, respectively.

<sup>b</sup>Calculated using a random set containing 10% of observations that were not included throughout refinement.

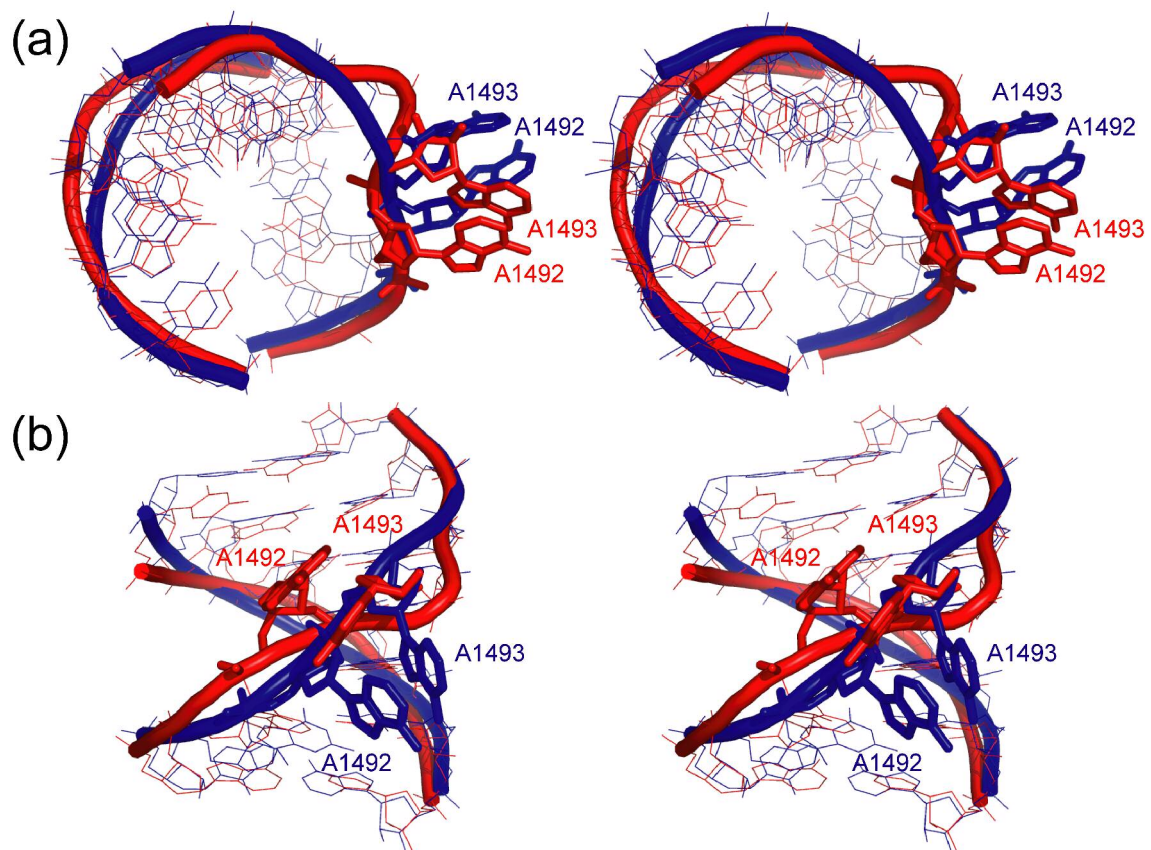

**Supplementary Figure 1.** Stereoviews of superimposition between “on” states of the *H. sapiens* cytoplasmic (red) and the bacterial A site (blue; PDB ID: 1J7T) (8) from two different angles.

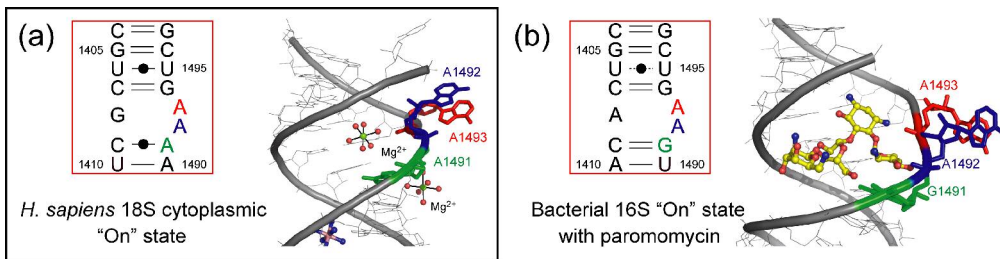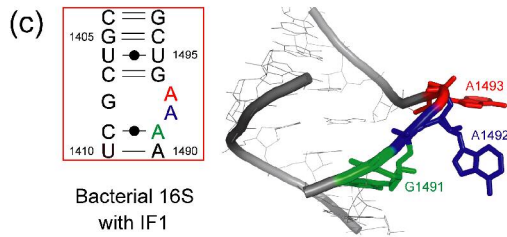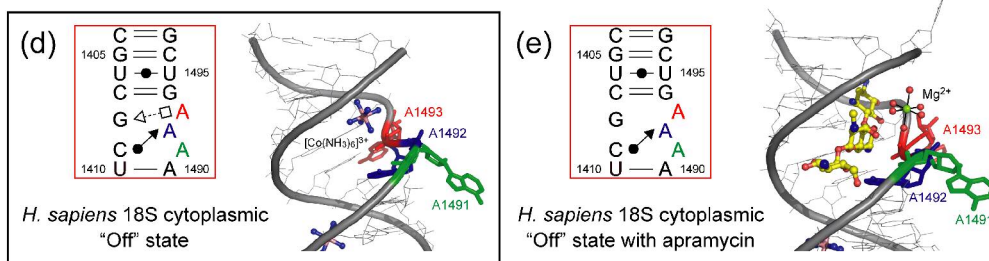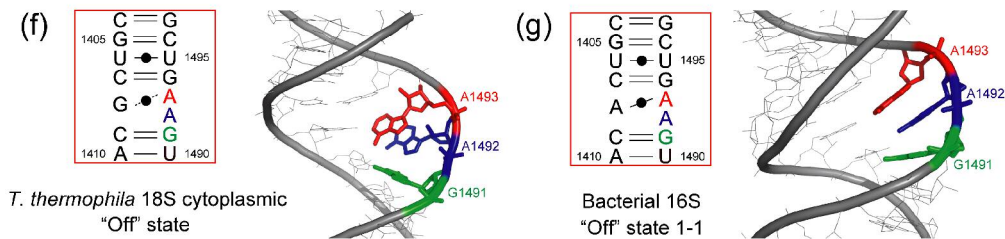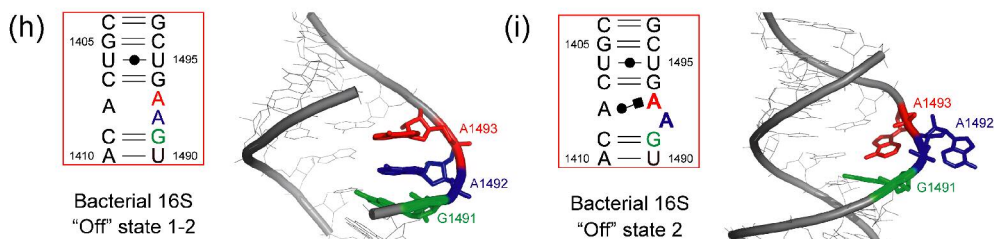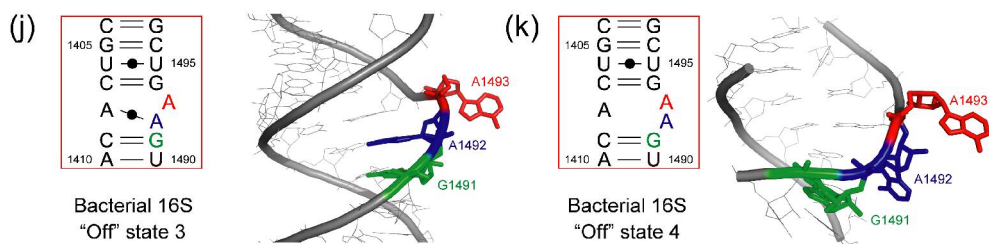

**Supplementary Figure 2.** Secondary and tertiary structures of the A site in the “on” and “off” states. (a) The “on” state of the *H. sapiens* 18S cytoplasmic A site. (b) The “on” state of the bacterial 16S A site in complex with paromomycin (PDB ID: 1J7T (2.5 Å)) (8). No “on” state of the bacterial 16S A site has been observed without drug except in presence of the initiation factor IF1 shown in (c) which displays the bacterial 16S A site in complex with initiation factor IF1 (PDB ID: 1HR0 (3.2 Å)) (45). (d) The “off” state of the *H. sapiens* 18S cytoplasmic A site. (e) The “off” state of the *H. sapiens* 18S cytoplasmic A site in complex with apramycin (2.8 Å) (Kondo, J., François, B., Urzhumtsev, A. and Westhof, E. Submitted). (f) The “off” state of the *T. thermophila* cytoplasmic A site (PDB ID: 1FYO). (g-k) Five “off” states of the bacterial 16S A site (PDB ID: 1J5E (3.05 Å), 2AVY (3.46 Å), 2ET8 (2.5 Å), 1T0E (1.7 Å), 1N34 (3.8 Å)) (2, 5, 7, 12, 14). The “on” and “off” states found in the present crystal structure are in black frame.
